# Supplementary material for: Ultralight, Ultraflexible, Anisotropic, Highly Thermally Conductive Graphene Aerogel Films
Source: MDPI journal article supplement (doi:10.3390/molecules26226867), 2021-11-14
Supplement: s1 [file s1]

## Supplementary Information

# Ultralight, ultraflexible, anisotropic highly thermally conductive graphene aerogel films

*Zheng Liu<sup>1,\*</sup>, Qinsheng Wang<sup>1</sup>, Linlin Hou<sup>2</sup>, Yingjun Liu<sup>2</sup>, & Zheng Li<sup>2</sup>*

1 Special Equipment Safety Supervision and Inspection Institute of Jiangsu Province, National Graphene Products Quality Inspection and Testing Center (Jiangsu), 330 Yanxin road, Huishan, Wuxi, P. R. China., Jiangsu Province 214174, P. R. China; Liuzheng1027@163.com (Z.L.); wqs@wxtjy.com (Q.W.)

2 MOE Key Laboratory of Macromolecular Synthesis and Functionalization, Department of Polymer Science and Engineering, Key Laboratory of Adsorption and Separation Materials & Technologies of Zhejiang Province, Zhejiang University, 38 Zheda Road, Hangzhou 310027, P. R. China; yilunliu@mail.xjtu.edu.cn (Y.L.), lizheng\_zju@zju.edu.cn (Z.L.)

\* Correspondence: Liuzheng1027@163.com; Tel.: +86-(0)51083256600 (Z.L.)

### Supporting information file includes:

Figures S1 to S5.

Tables S1.

## Supporting Information

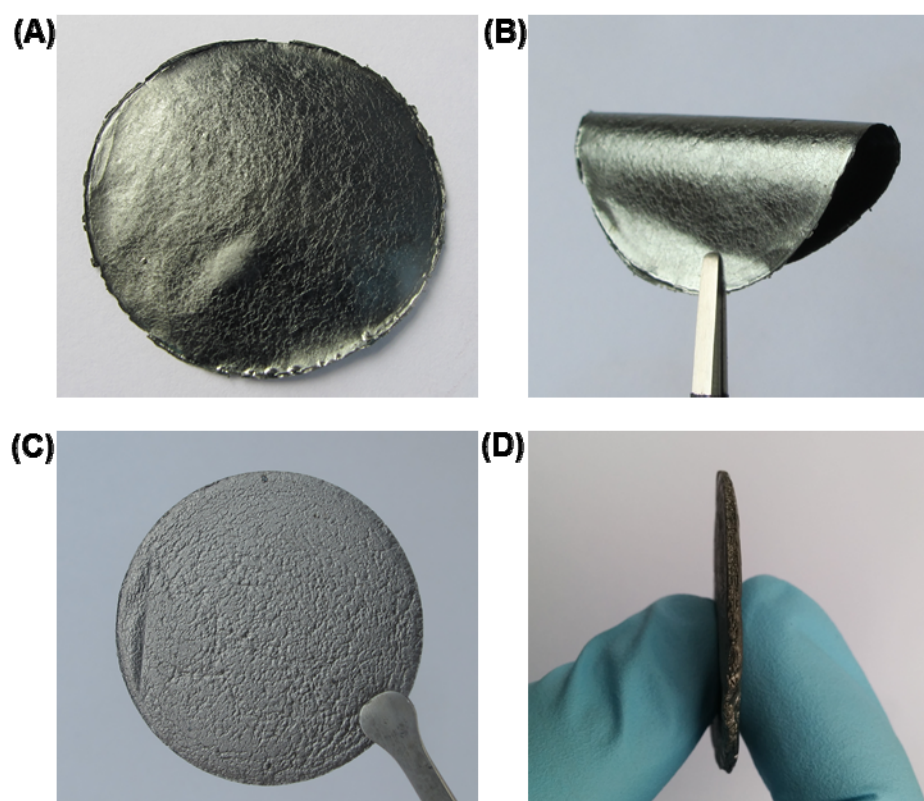

**Figure S1.** (A,B) Graphene film reduced by HI solution. (C,D) Graphene film after carbonization under 3000 °C with loose and porous structure.

**Table S1.** Detailed data of Elemental analysis, XRD and Raman for GO and GAFs at different annealing temperature.

| Sample  | C(%)   | O(%)   | C+O    | Peak<br>2 $\theta$ | d-spacing | Crystal<br>sizes | ID/IG | I2D/IG   | D       | G       | 2D      |
|---------|--------|--------|--------|--------------------|-----------|------------------|-------|----------|---------|---------|---------|
| GO      | 46.86  | 44.249 | 91.109 | /                  | /         | /                | 0.79  | 0.065457 | 1362.32 | 1587.66 | 2693.7  |
| GAF-HI  | 53.96  | 36.28  | 90.24  | 24.54              | 3.623     | 8.742            | 1.05  | 0.066844 | 1352.17 | 1576.97 | 2691.9  |
| GAF500  | 62.76  | 31.182 | 93.942 | 25.35              | 3.509     | 7.441            | 0.78  | 0.024827 | 1354.25 | 1575.34 | 2698.42 |
| GAF1000 | 90.08  | 3.63   | 93.71  | 26.16              | 3.402     | 11.108           | 1.02  | 0.079894 | 1351.41 | 1575    | 2701.7  |
| GAF1500 | 92.55  | 0      | 92.55  | 26.32              | 3.382     | 12.875           | 0.16  | 0.258177 | 1360.27 | 1579.37 | 2717.3  |
| GAF2000 | 95.12  | 0      | 95.12  | 26.37              | 3.376     | 13.597           | 0.03  | 0.40775  | 1360    | 1578.2  | 2723.18 |
| GAF2500 | 99.69  | 0      | 99.69  | 26.48              | 3.362     | 26.985           | 0.004 | 0.339415 | 1375.91 | 1580.43 | 2740.2  |
| GAF3000 | 100.37 | 0      | 100.37 | 26.52              | 3.357     | 27.984           | 0.004 | 0.321718 | /       | 1578.29 | 2740.68 |

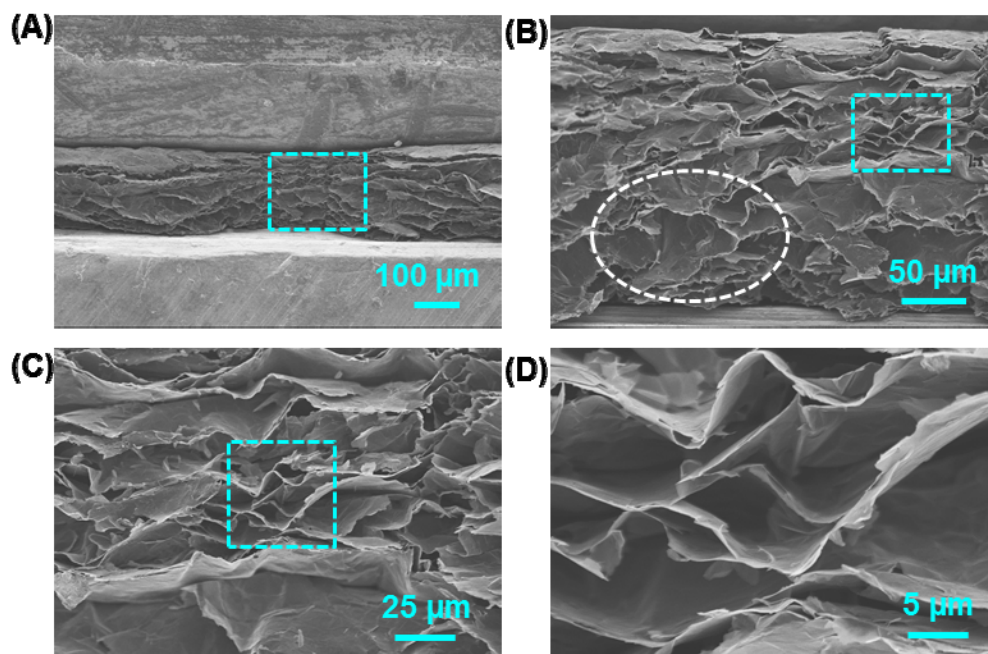

**Figure S2.** Cross-section of a GAF annealed at 3000 °C with a loose and porous structure that made by tear opening.

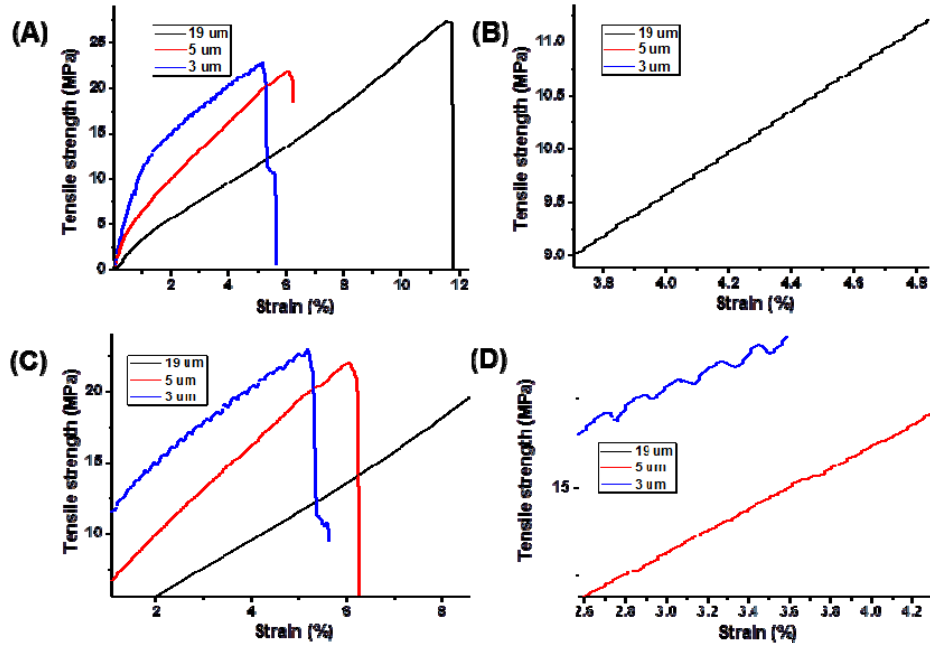

**Figure S3.** Stress-strain curves of compressed GAFs with thicknesses of 3  $\mu\text{m}$ , 5  $\mu\text{m}$  and 19  $\mu\text{m}$ . All three curves performed obvious step-like periodic features, while the 19  $\mu\text{m}$  film in a much smaller scale.

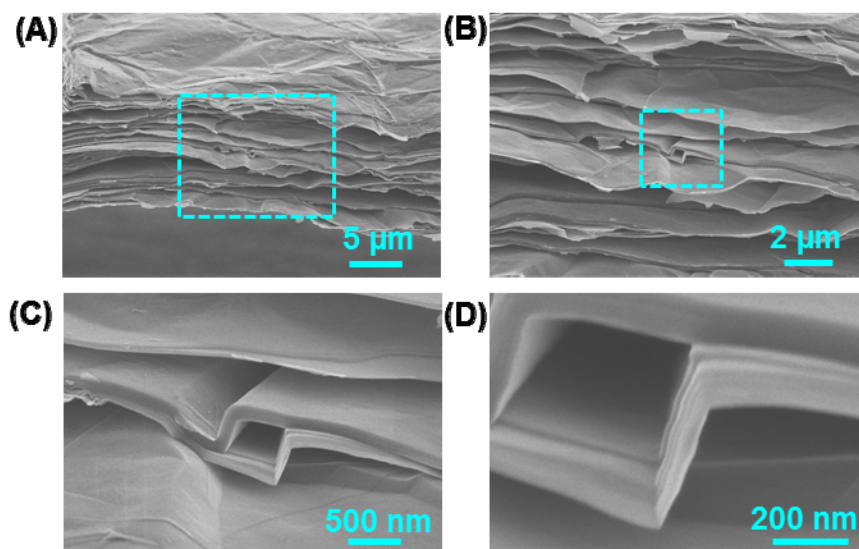

**Figure S4.** Cross-section of compressed GAFs that illustrates Z-shape folding formed by compression of multilayer graphene of gas chambers.

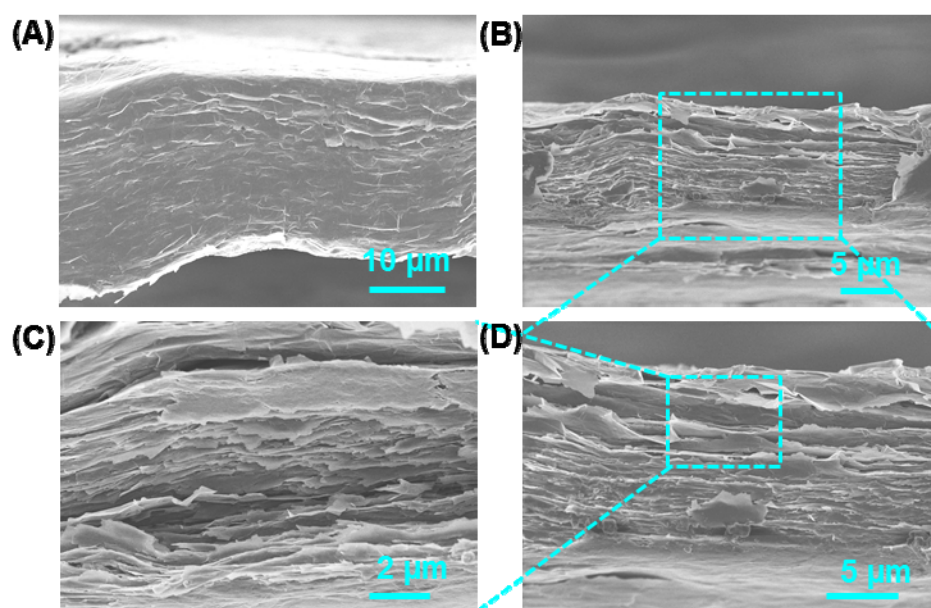

**Figure S5.** Cross-section of a pressed graphene film with highly compacted and oriented structure.
